# Supplementary material for: A quasi-solid-state and self-powered biosupercapacitor based on flexible nanoporous gold electrodes
Source: Royal Society of Chemistry journal article supplement (doi:10.1039/c8cc02555j), 2018-01-01
Supplement: c8cc02555j1.pdf [file c8cc02555j1.pdf]

## Supplementary information

# A quasi-solid-state and self-powered biosupercapacitor based on flexible nanoporous gold electrodes

Xinxin Xiao\*, Edmond Magner\*

5 Department of Chemical Sciences and Bernal Institute, University of Limerick, Limerick  
V94 T9PX, Ireland

\* Corresponding author: Xinxin Xiao (E-mail address: xinxin.xiao@ul.ie); Edmond  
Magner (E-mail address: edmond.magner@ul.ie; Fax: +353 61 213529; Tel: +353 61  
234390)

10

## 1. EXPERIMENTAL SECTION

### 1.1. Materials

D-(+)-glucose (99.5%), GOx from *Aspergillus niger* (EC 1.1.3.4, type II,  $\geq 15,000$  U g-  
15 1), phosphoric acid ( $\geq 85\%$ ), potassium hydroxide pellets (KOH), PVA (MW 146000-  
186,000,  $\geq 99\%$  hydrolysed), poly(ethylene glycol)diglycidyl ether (PEGDGE), sodium  
phosphate (monobasic dehydrate  $\geq 99\%$  and dibasic  $\geq 99\%$ ), sodium fluoride (NaF,  
99.99%) and sulfuric acid (H<sub>2</sub>SO<sub>4</sub>, 95-98%) were purchased from Sigma-Aldrich Ireland,  
Ltd. *Myrothecium verrucaria* BOx (EC 1.3.3.5, 2.63 U mg<sup>-1</sup>) was obtained as a gift from  
20 Amano Enzyme Inc., Japan. Os(dmbpy)<sub>2</sub>PVI and Os(bpy)<sub>2</sub>PVI were synthesised  
according to an established procedure<sup>1,2</sup>. Deionised water (18.2 MΩ cm, Elga Purelab  
Ultra, UK) was used to prepare all the solutions.

### 1.2. Electrochemical dealloying

25 100 nm Ag<sub>70</sub>/Au<sub>30</sub> (atomic %) alloy was magnetic sputtered onto 100 μm thin  
polyethylene terephthalate (PET) in an ultra-high vacuum chamber following a previous  
report<sup>3</sup>. Typically, PET substrates were firstly cleaned using Ar plasma treatment,  
followed by the coating of a Ti adhesive layer (10 nm), Au protective layer (ca. 35 nm)  
and alloy layer. The as-sputtered sheet with a diameter of 85 mm was cut using scissors

into rectangular pieces and painted with dielectric paste (Gwent Group, UK) to define an electrode area of 1 cm<sup>2</sup>.

5 An electrochemical dealloying procedure was employed to prepare NPG<sup>4</sup>. Briefly, the alloy was allowed to be anodized at +1.5 V vs. SCE in 0.5 M NaF at room temperature (20±2 °C) for 10 min and subsequently cleaned by scanning the potential from -0.2 to 1.65 V in 1 M H<sub>2</sub>SO<sub>4</sub> at 100 mV s<sup>-1</sup> for 15 cycles. The reduction peak of 15<sup>th</sup> cycle of cyclic voltammogram (CV) was used to calculate the electrochemically addressable surface area (*A<sub>real</sub>*) of NPG assuming a unit of 390 μC cm<sup>-2</sup> for the reduction of a single  
10 layer of gold oxide<sup>5</sup>. The roughness factor (*R<sub>f</sub>*) is defined as the ratio of *A<sub>real</sub>* to the geometric area (*A<sub>geo</sub>*). The average pore size and crack width of NPG by analysing at least 30 measurement points of scanning electron microscopic (SEM) images obtained a Hitachi SU-70 SEM at 15 kV.

### 15 **1.3. Enzyme immobilisation**

A 21.2 μL of 6 mg mL<sup>-1</sup> aqueous solution of redox polymer, Os(dmbpy)<sub>2</sub>PVI or Os(bpy)<sub>2</sub>PVI, was mixed homogeneously with 5.2 μL of 15 mg mL<sup>-1</sup> aqueous solution of PEGDGE and, either 12.8 μL of 10 mg mL<sup>-1</sup> solution of GOx or BOx. The as-prepared solution was drop-casted onto a NPG electrode to cover its surface carefully. The  
20 electrodes were allowed to be placed in a vacuum desiccator connected to a vacuum pump for 20 min, which were then transferred into a 4°C fridge, allowed to dry overnight in the dark. To elucidate the role of the enzymes on the potential recovery, NPG electrodes modified only with redox polymer and cross-linker were also prepared following the same protocol.

25

### **1.4. Solid-state electrolyte preparation and characterisation**

3 g PVA powder was added into a beaker containing 30 mL of 0.1 M phosphoric acid and was completely dissolved for about 30 min stirring in a 90°C water-bath. The hot solution was then poured into a polystyrene petri dish with a diameter of 90 mm. An even  
30 and transparent film was formed after 24 h dry in a 30 °C oven. The obtained film was immersed in a 0.1 M KOH solution for 2 h to neutralise its pH. Prior to using, the film

was further soaked in 0.1 M pH 7.0 PBS containing 100 mM glucose for 24 h to load proper amount of substrate for enzymes. The thickness of the dry PVA film was 270  $\mu\text{m}$  determined by SEM.

5 Fourier transform infrared (FTIR) analysis was performed to examine the structure of PVA films using a Perkin Elmer Spectrum 100 interferometer. Water content of PVA hydrogel was obtained by thermogravimetric analysis (TGA, TGA 4000, Perkin Elmer) in a temperature range from 30 to 300  $^{\circ}\text{C}$  with a heating rate of 10  $^{\circ}\text{C min}^{-1}$  under a  $\text{N}_2$  stream with a flow rate of 20  $\text{mL min}^{-1}$ . Electrochemical impedance spectroscopy (EIS,  
10 from 10 to 200 kHz) of Toray carbon paper (Fuel Cell Etc., USA) sandwiched PVA hydrogel was conducted to measure the ionic conductivity ( $\sigma$ ,  $\text{S cm}^{-1}$ ) of the PVA hydrogel, which can be obtained by the following equation:

$$\sigma = \frac{l}{R_b \times A} \quad (S1)$$

where  $l$  (cm) is the PVA film thickness,  $R$  ( $\Omega$ ) is the bulk resistance obtained from the  
15 Nyquist plot,  $A$  ( $\text{cm}^2$ ) is the contact area of the PVA film with Toray paper electrodes.

The ionic conductivity of 0.1 M pH 7.0 PBS was measured at 25  $^{\circ}\text{C}$  using a Jenway 4510 conductivity meter (cell constant = 1.01  $\text{cm}^{-1}$ ).

## 20 **1.5. Assembly of the all-solid-state biosupercapacitor**

The device was assembled by sandwiching the PVA hydrogel as a solid electrolyte between a  $\text{NPG/Os(dmbpy)}_2\text{PVI/GOx}$  bioanode and a  $\text{NPG/Os(bpy)}_2\text{PVI/BOx}$  biocathode. Dialysis cellulose membranes (Spectra/Por<sup>®</sup> 1, 6-8 kD Molecular weight cut-off, Spectrum Medical Devices, CA) were used to encapsulate the assembled cells.

25

## **1.6. Electrochemical measurements**

Electrochemical characterisation was performed using a CHI802 potentiostat (CH Instruments, Austin, Texas) with a three-electrode system comprising NPG based working electrodes, a saturated calomel electrode (SCE) as the reference electrode and a

platinum mesh counter electrode. All experiments were carried out at room temperature ( $20\pm 2$  °C) unless stated otherwise.

5 The assembled EBFCs using aqueous or solid-state electrolyte were tested in a two-electrode system by using a NPG/Os(dmbpy)<sub>2</sub>PVI/GOx bioanode as the working electrode and a NPG/Os(bpy)<sub>2</sub>PVI/BOx biocathode as the combined counter/reference electrode. The current in the potential range between the open circuit voltage (OCV) of the EBFC and 0 V at  $1 \text{ mV s}^{-1}$  was measured, according to which power density profile can be calculated.

10

Testing of the self-charge/discharge properties of the biosupercapacitor was performed with an Autolab PGSTAT302N potentiostat (Eco Chimie, Netherlands). The NPG/Os(bpy)<sub>2</sub>PVI/BOx biocathode and NPG/Os(dmbpy)<sub>2</sub>PVI/GOx bioanode were used as working and combined counter/reference electrodes, respectively. The testing  
15 sequence was composed of (i) stand at open-circuit with open-circuit-potential (OCP) recorded and (ii) galvanostatic discharge at certain current densities ranging from 5 to  $500 \mu\text{A cm}^{-2}$ . Discharge was triggered when any of the following conditions was satisfied: i) standing time reached to 20 min; ii) OCP reached to the set cut-off potential (*e.g.* 0.3 V), which was lower than the OCV of the biofuel cell.

## 2. Supplementary figures

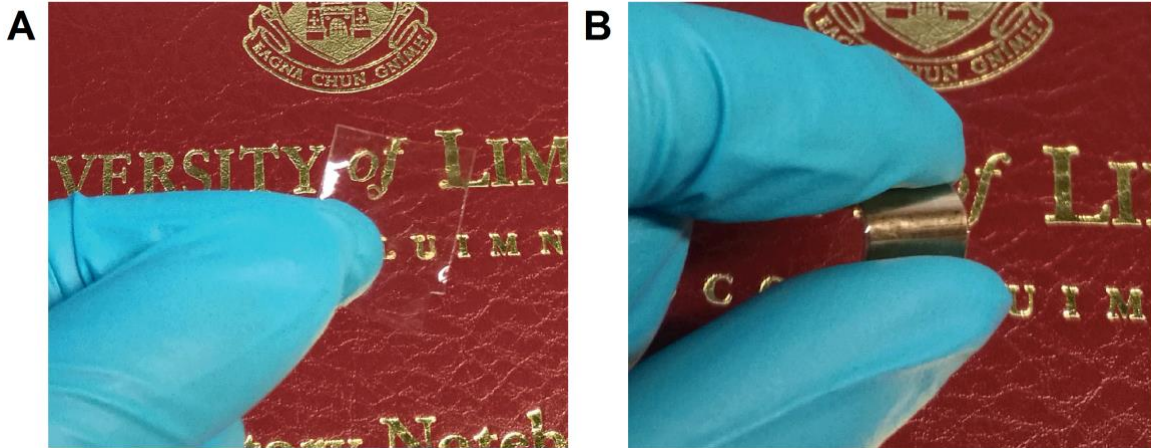

**Fig. S1.** Photograph of the PVA hydrogel (A) and assembled flexible device (B).

5

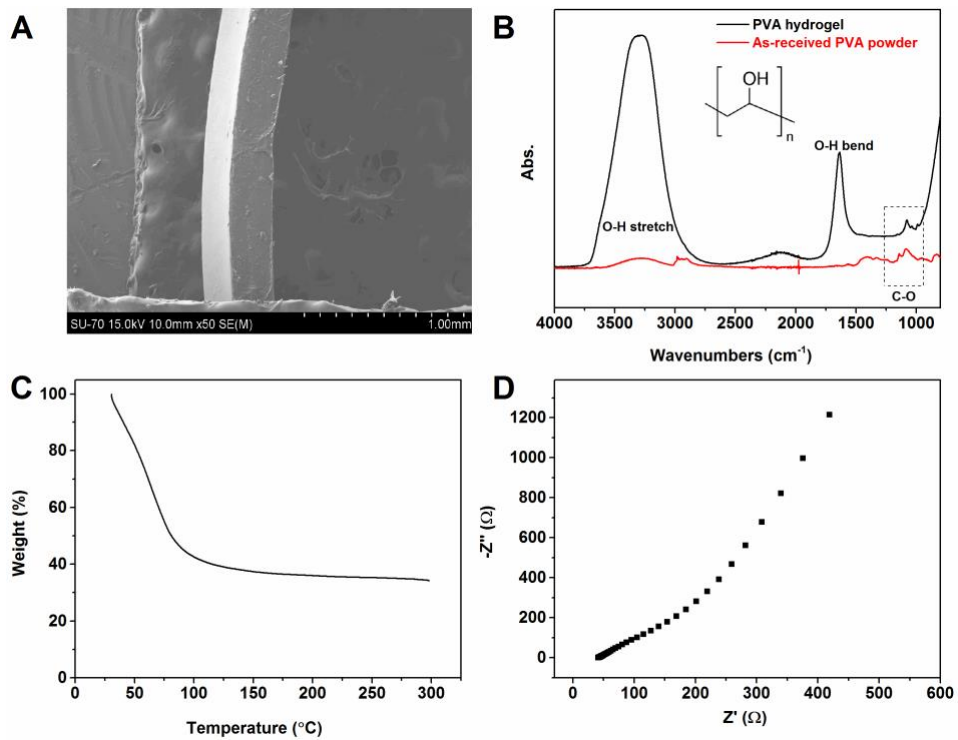

**Fig. S2.** (A) Cross-section viewed SEM image of a PVA film; (B) FTIR spectra of the PVA hydrogel and as-received PVA powder; inset of (B) indicates the structure of PVA.

(C) The TGA curve of the PVA hydrogel; (D) Nyquist plot of the prepared solid-state

electrolyte.

10

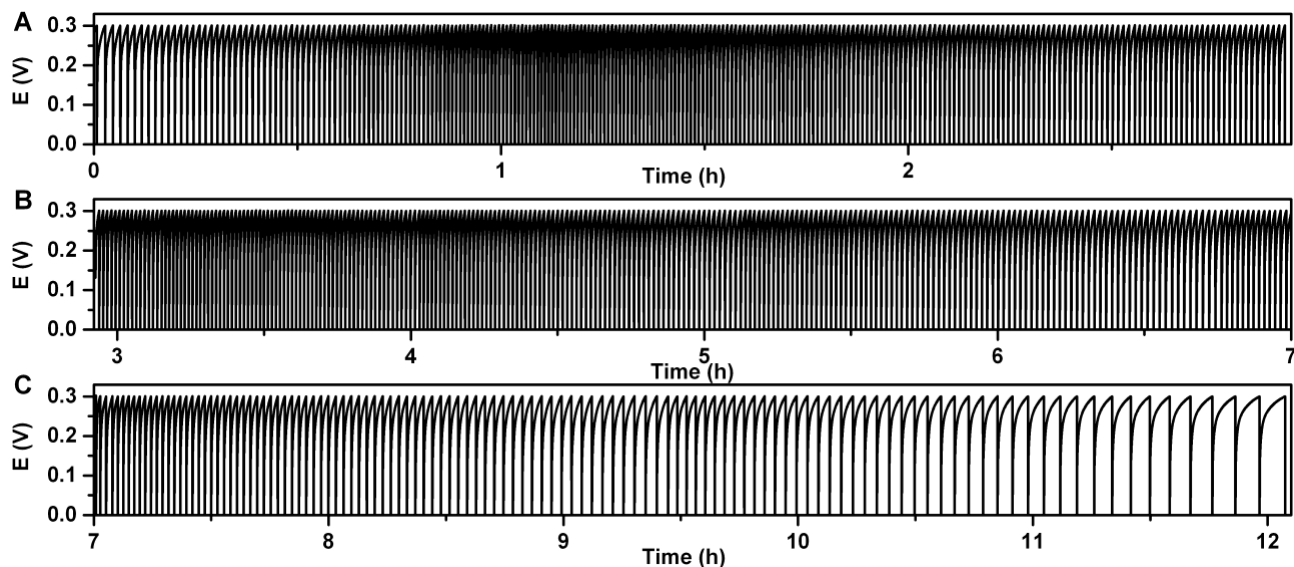

**Fig. S3.** Potential profile of the all-solid-state device for 620 cycles: (A): 1-250<sup>th</sup>; (B): 251-500<sup>th</sup>, (C): 501-620<sup>th</sup> cycle; Experimental protocol: reset at open-circuit for 20 min and cutoff at 0.3 V, followed by discharging at 0.1 mA cm<sup>-2</sup> and cutoff at 0 V.

## 5 REFERENCES

- 1 E. M. Kober, J. V. Caspar, B. P. Sullivan and T. J. Meyer, *Inorg. Chem.*, 1988, **27**, 4587-4598.
- 2 R. J. Forster and J. G. Vos, *Macromolecules*, 1990, **23**, 4372-4377.
- 3 T. Siepenkoetter, U. Salaj-Kosla, X. Xiao, S. Belochapkin and E. Magner, *Electroanalysis*, 2016, **28**, 2415-2423.
- 4 X. Xiao, T. Siepenkoetter, P. Ó. Conghaile, D. Leech and E. Magner, *ACS Appl. Mater. Interfaces*, 2018, **10**, 7107-7116.
- 5 S. Trasatti and O. A. Petrii, *Pure Appl. Chem.*, 1991, **63**, 711-734.
